# Supplementary material for: Molecular-enriched functional connectivity in the human brain using multiband multi-echo simultaneous ASL/BOLD fMRI
Source: PubMed Central journal article supplement (PMC10359289; doi:10.1038/s41598-023-38573-0), 2023-07-20
Supplement: 41598_2023_38573_MOESM1_ESM.pdf [file 41598_2023_38573_MOESM1_ESM.pdf]

**Molecular-enriched functional connectivity in the human  
brain using multiband multi-echo simultaneous ASL/BOLD  
fMRI**

Ottavia Dipasquale, Alexander Cohen, Daniel Martins, Fernando Zelaya, Federico Turkheimer, Mattia Veronese, Mitul Mehta, Steven CR Williams, Baolian Yang, Suchandrima Banerjee, Yang Wang

Supplementary material

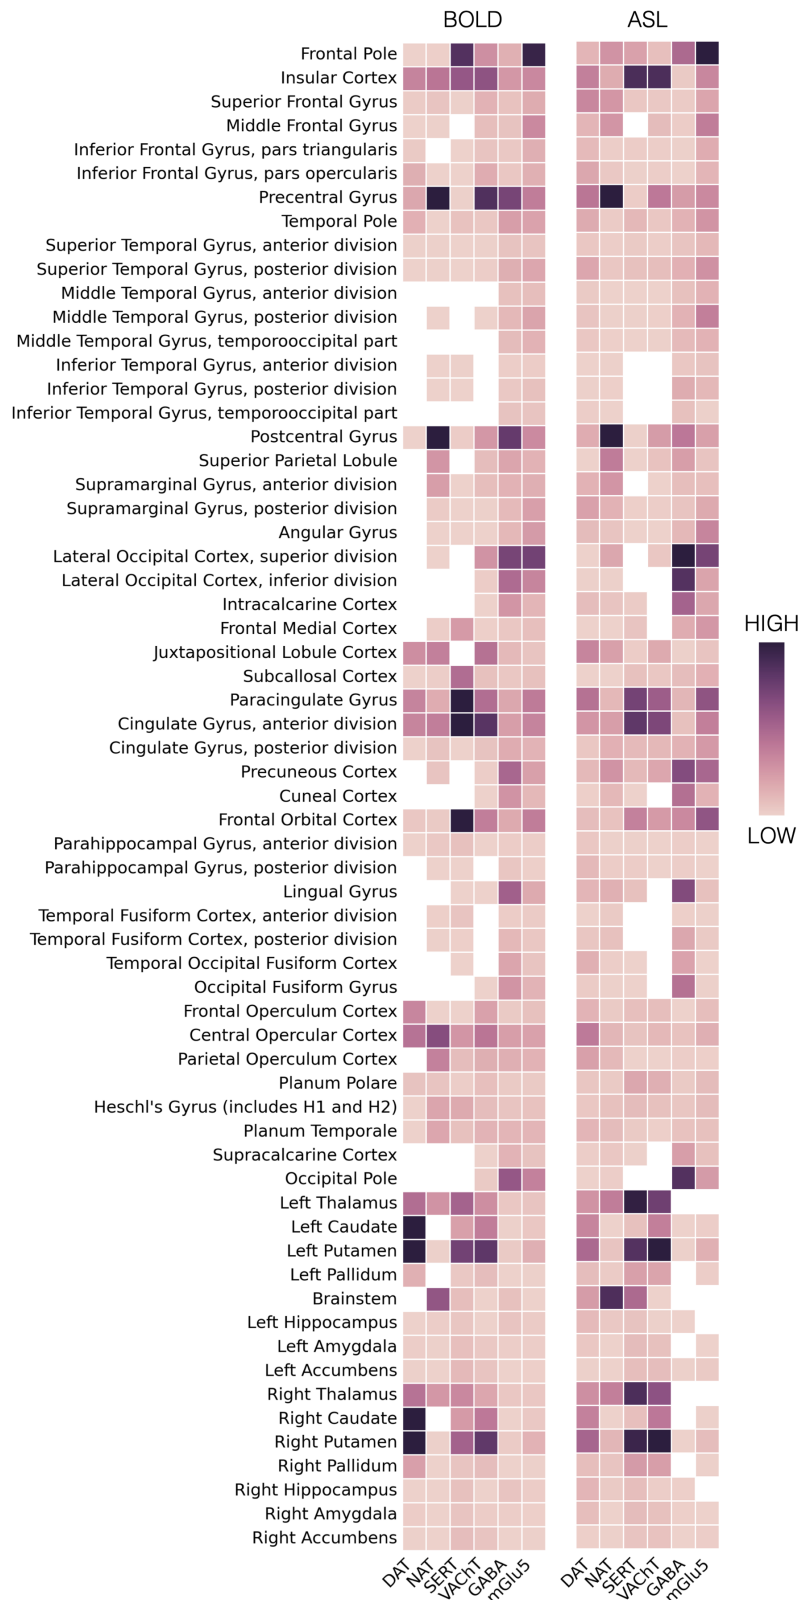

Supplementary Figure 1 List of regions that reported significant within-group positive FC in the molecular-enriched functional maps derived from the BOLD and ASL datasets. For each functional network and dataset, the color scale indicates the probability of the regions to belong to that network.
